# Supplementary material for: Sonochemical Combined Synthesis of Nickel Ferrite and Cobalt Ferrite Magnetic Nanoparticles and Their Application in Glycan Analysis
Source: MDPI journal article supplement (doi:10.3390/ijms23095081), 2022-05-03
Supplement: s1 [file s1]

## Supplementary Information

# Sonochemical Combined Synthesis of Nickel-Ferrite and Cobalt-Ferrite Magnetic Nanoparticles and Their Application in Glycan Analysis

Ágnes M. Ilosvai<sup>1</sup>, Dalma Dojcsák<sup>2</sup>, Csaba Váradi<sup>2</sup>, Miklós Nagy<sup>1\*</sup>, Ferenc Kristály<sup>3</sup>, Béla Fiser<sup>1</sup>, Béla Viskolcz<sup>1</sup> and László Vanyorek<sup>1\*</sup>

<sup>1</sup> Institute of Chemistry, University of Miskolc, Miskolc-Egyetemváros, 3515 Miskolc, Hungary ; agnes.ilosvai.maria@uni-miskolc.hu (Á .M.I); kemiklos@uni-miskolc.hu (M.N.); kemfiser@uni-miskolc.hu (B.F.); bela.viskolcz@uni-miskolc.hu (B.V.); kemvanyi@uni-miskolc.hu (L.V.)

<sup>2</sup> Advanced Materials and Intelligent Technologies Higher Education and Industrial Cooperation Centre, University of Miskolc, 3515 Miskolc, Hungary; dalma.dojcsak@uni-miskolc.hu (D.D.); kemcsv@uni-miskolc.hu (C.V.)

<sup>3</sup> Institute of Mineralogy and Geology, University of Miskolc, Miskolc-Egyetemváros, 3515 Miskolc, Hungary; askkf@uni-miskolc.hu

\* Correspondence: kemiklos@uni-miskolc.hu and kemvanyi@uni-miskolc.hu

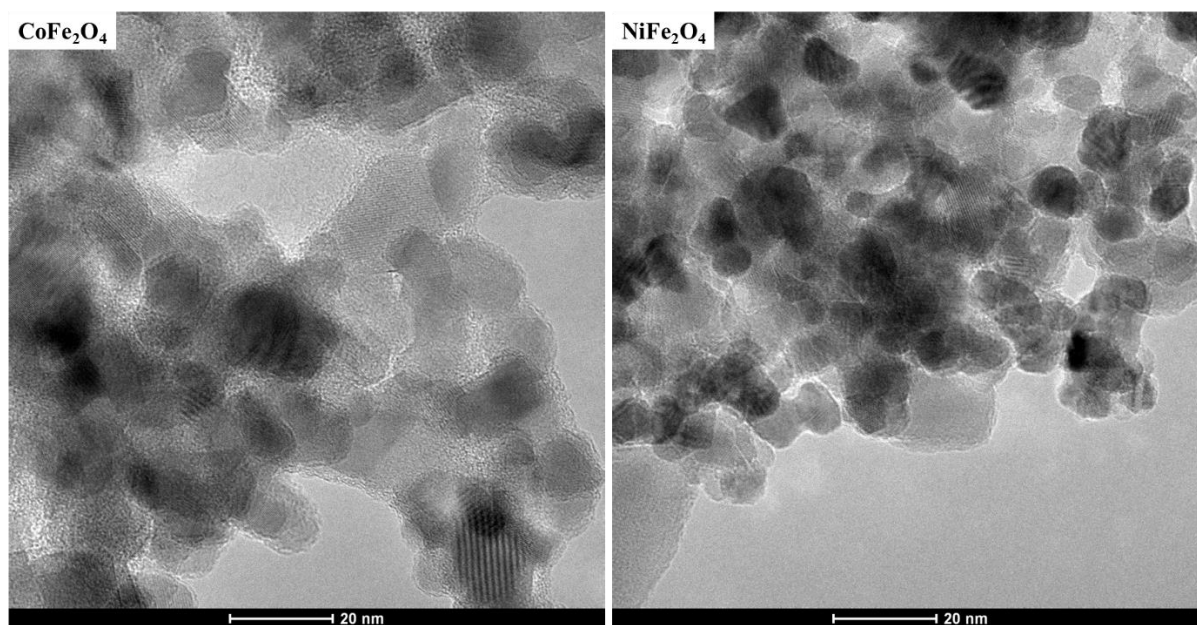

**Figure S1.** HRTEM pictures of the NiFe<sub>2</sub>O<sub>4</sub> and CoFe<sub>2</sub>O<sub>4</sub> nanoparticles.
